# Supplementary material for: Uterine Radial Artery Resistance Index Predicts Reproductive Outcome in Women with Recurrent Pregnancy Losses and Thrombophilia
Source: Hindawi journal article supplement (doi:10.1155/2019/8787010), 2019-06-20
Supplement: f1 [file 8787010.f1.pdf]

A

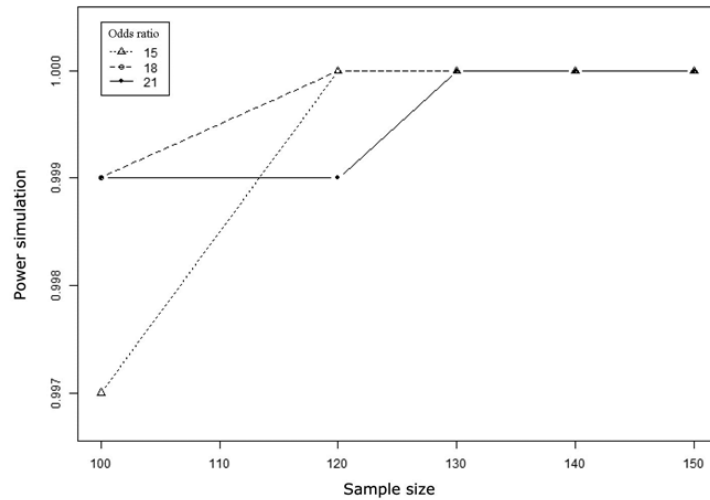

The power of different sample size with URa-RI as a continuous variable.

|        | OR=15 | OR=18 | OR=21 |
|--------|-------|-------|-------|
| N= 100 | 0.997 | 0.999 | 0.999 |
| N= 120 | 1     | 1     | 0.999 |
| N= 130 | 1     | 1     | 1     |
| N= 140 | 1     | 1     | 1     |
| N= 150 | 1     | 1     | 1     |

B

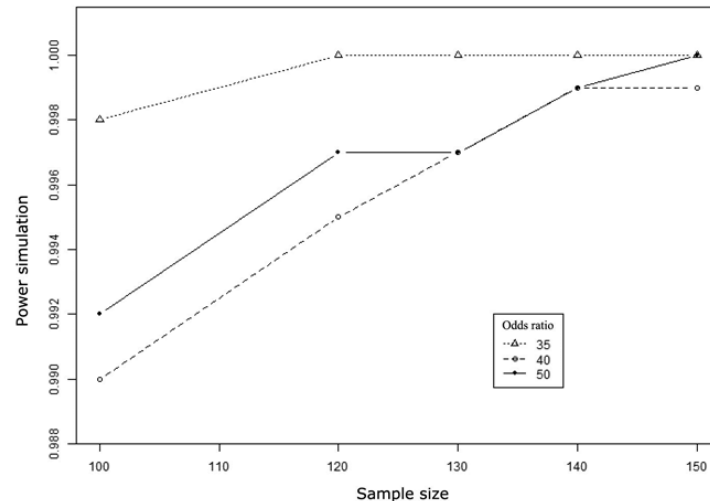

The power of different sample size with URa-RI as a binary categorical variable.

|        | OR= 35 | OR =40 | OR= 50 |
|--------|--------|--------|--------|
| N= 100 | 0.998  | 0.990  | 0.992  |
| N= 120 | 1      | 0.995  | 0.997  |
| N= 130 | 1      | 0.997  | 0.997  |
| N= 140 | 1      | 0.999  | 0.999  |
| N= 150 | 1      | 0.999  | 1      |

**Supplement figure 1.** The power of different sample size was shown when URa-RI was used as a continuous (A) and a binary categorical variable (B), respectively.
